1 Short report

2

3 **Stringent structural plasticity of dendritic spines revealed by two-**  
4 **photon glutamate uncaging in adult mouse neocortex *in vivo***

5

6

7 Jun Noguchi<sup>1,2\*</sup>, Akira Nagaoka<sup>2</sup>, Tatsuya Hayama<sup>2</sup>, Hasan Ucar<sup>2,3</sup>, Sho Yagishita<sup>2,3</sup>,  
8 Noriko Takahashi<sup>2,4</sup> & Haruo Kasai<sup>2,3\*</sup>

9

10 <sup>1</sup> Department of Ultrastructural Research, National Institute of Neuroscience, National  
11 Center of Neurology and Psychiatry, Kodaira, Tokyo, 187-8502, Japan

12 <sup>2</sup> Laboratory of Structural Physiology, Center for Disease Biology and Integrative  
13 Medicine, Faculty of Medicine, The University of Tokyo, Bunkyo-ku, Tokyo, 113-  
14 0033, Japan

15 <sup>3</sup> International Research Center for Neurointelligence (WPI-IRCN), UTIAS, The  
16 University of Tokyo, Bunkyo-ku, Tokyo, Japan

17 <sup>4</sup> Department of Physiology, Kitasato University School of Medicine, Sagamihara,  
18 Kanagawa, 252-0374, Japan

19

20 \* Correspondence should be addressed to J.N. ([jnoguchi@ncnp.go.jp](mailto:jnoguchi@ncnp.go.jp)) or H.K.

21 ([hkasai@m.u-tokyo.ac.jp](mailto:hkasai@m.u-tokyo.ac.jp)).

22

23

## 24 **Abstract**

25

26 Two-photon uncaging of glutamate is widely utilized to characterize structural plasticity

27 in brain slice preparations *in vitro*. In this study, we investigated spine plasticity by

28 using, for the first time, glutamate uncaging in the neocortex of adult mice *in vivo*.

29 Spine enlargement was successfully induced in a smaller fraction of spines in the

30 neocortex (22%) than in young hippocampal slices (95%), even under a low magnesium

31 condition. Once induced, the time course and mean amplitudes of long-term

32 enlargement were the same (81%) as those *in vitro*. However, low-frequency (1–2 Hz)

33 glutamate uncaging caused spine shrinkage in a similar fraction (34%) of spines as *in*

34 *vitro*, but spread to the neighboring spines less frequently than *in vitro*. Thus, we found

35 that structural plasticity can occur similarly in the adult neocortex *in vivo* as in the

36 hippocampus *in vitro*, although it happens stringently in a smaller subset of spines.

37

## 38 Introduction

39

40 Most excitatory synapses in the brain form on dendritic spines. The volume of dendritic  
41 spines is tightly correlated with the functional expression of glutamate receptors in the  
42 young hippocampus *in vitro* (Matsuzaki et al., 2001; Smith et al., 2003; Beique et al.,  
43 2006; Asrican et al., 2007; Holbro et al., 2009; Zito et al., 2009) and in the adult mouse  
44 neocortex *in vivo* (Noguchi et al., 2011). Spine volume changes have been associated  
45 with long-term potentiation and depression of synapses in hippocampal preparations  
46 (Zhou et al., 2004; Kopec et al., 2007). Such volume changes eventually cause the  
47 generation and elimination of spines (Yasumatsu et al., 2008; Bhatt et al., 2009;  
48 Holtmaat et al., 2009; Xu et al., 2009; Kasai et al., 2010; Hayashi-Takagi et al., 2015).  
49 Impaired structural plasticity induces pathological states of neuronal circuits (Fiala et  
50 al., 2002; Kasai et al., 2010; Forrest et al., 2018).

51 Two-photon uncaging of caged glutamate compounds (Matsuzaki et al., 2001) is  
52 the only available method that reliably stimulates single spines. It is widely used to  
53 characterize spine structural plasticity *in vitro*. Spine enlargement is most robustly  
54 induced by uncaging caged glutamate in the absence of external magnesium ( $Mg^{2+}$ ) so  
55 that *N*-methyl-D-aspartic acid (NMDA) receptors are maximally activated (Matsuzaki et  
56 al., 2004; Noguchi et al., 2005; Harvey et al., 2007; Honkura et al., 2008; Lee et al.,  
57 2009; Govindarajan et al., 2011; Bosch et al., 2014). Spine shrinkage can be induced by  
58 low-frequency uncaging (Hayama et al., 2013; Oh et al., 2013; Noguchi et al., 2016).  
59 However, assessing spine plasticity with two-photon uncaging has never been  
60 characterized *in vivo* because of difficulties in uncaging *in vivo*. The characteristics of

61 structural plasticity is unknown in the adult mouse neocortex *in vivo*.

62 We previously established a glutamate uncaging method *in vivo* in which a caged  
63 glutamate compound is applied on the surface of the brain. This method allows the  
64 compound to spread into the superficial extracellular space of the neocortex for free  
65 diffusion (Noguchi et al., 2011). We now extend our study to focus on the structural  
66 plasticity of dendritic spines *in vivo*.

67

68

## 69 **Results and Discussion**

70

### 71 **Spine enlargement *in vivo***

72 Two-photon uncaging of the caged glutamate compound was applied to single spines of  
73 tuft dendrites of layer 5/6 pyramidal neurons in the visual cortex of adult mice *in vivo*  
74 (Noguchi et al., 2011). We used the green fluorescent protein (GFP)-expressing M  
75 mouse line or the yellow fluorescent protein (YFP)-expressing H mouse line in which a  
76 subset of layer 5/6 pyramidal neurons was selectively labelled. Mice were anesthetized  
77 with urethane and xylazine and placed under a microscope objective lens using an  
78 imaging chamber that was firmly attached on the skull of the mouse (*Figure 1A*). To  
79 activate NMDA receptors effectively, the recording chamber was superfused with  
80 artificial cerebrospinal fluid containing no magnesium (Mg) ions. Caged glutamate was  
81 thereafter superfused (*Figure 1A and Figure 1-figure supplement 1A*). Spine head  
82 volume ( $V_H$ ) fluctuations before uncaging were quantified as coefficients of variation  
83 (CVs) (*Figure 1-figure supplement 1B*). The CV of *in vivo* neocortex spines ( $15\% \pm$   
84  $16\%$  [mean  $\pm$  standard deviation (SD)]; 227 spines) was not larger than that of

85 hippocampal slices (21%)(Matsuzaki et al., 2004), which ensured the stability of our  
86 recording conditions.

87 Enlargement of the spines could be induced by two-photon glutamate uncaging  
88 repeated 60 times at 1 Hz adjacent to the spine heads (*Figures 1B and 1C*). Volume  
89 changes varied among individual spines; however, the averaged time course showed a  
90 transient increment phase, followed by a stable plateau phase (*Figure 1D*). For spines  
91 showing >30% enlargement, the peak enlargement (10–30 min) and sustained phase of  
92 enlargement (>60 min) were  $109\% \pm 24\%$  (the mean  $\pm$  the standard error of the mean:  
93 16 spines/10 dendrites/10 mice) and  $50\% \pm 12\%$ , respectively. These values were  
94 similar to those of CA1 pyramidal neurons *in vitro* (Matsuzaki et al., 2004).

95 Enlargement lasting more than 30 min occurred in 8 of 16 enlarged spines (*Figure 1E*)  
96 and was confined to the stimulated spines (*Figures 1D and 1F*).

97 Enlargement was recorded only in a small fraction of spines (22% of 74 spines/20  
98 dendrites/18 mice; *Figure 1E*), compared with the fraction in the hippocampus *in vitro*  
99 (approximately 95%) (Matsuzaki et al., 2004). In spines without enlargement ( $\Delta V_H$   
100 <30%), the average enlargement was negligible ( $-0.6\% \pm 2.5\%$ ) (*Figure 1D*). The  
101 stringency in spine enlargement was not because of technical reasons; the enlargement  
102 was induced mostly in one spine (0–4 spines; average, 0.8 spine) among several spines  
103 (1–7 spines; average, 3.7 spines) that were simultaneously stimulated. This conclusion  
104 was quantitatively supported by the fact that the amplitude of the enlargement of  
105 stimulated spines was uncorrelated with the distance of the spine from a spine showing  
106 significant enlargement (*Figure 1G*). In these studies, we selected small spines (*Figure*  
107 *1-figure supplement 2A*) in which enlargement could be induced in the most  
108 pronounced manner. The enlargement was uncorrelated with spine neck length, depth,

109 and mouse age (*Figures 1–figure supplement 2B–D*).

110

### 111 **Spine shrinkage *in vivo***

112 We used a solution containing a physiological concentration (1 mM) of Mg<sup>2+</sup> to study  
113 spine shrinkage (Noguchi et al., 2016). Several spines on a dendrite were stimulated by  
114 low-frequency two-photon glutamate uncaging (2.8 spines/dendrite, 1–2 Hz, 5–15 min)  
115 (*Figure 2A*). Stimulated spines showed a large volume reduction (*Figures 2A and 2B*,  
116 spine “S1”). The spine volume gradually reduced *in vitro* (Hayama et al., 2013;  
117 Noguchi et al., 2016) (*Figure 2C*). We found that 34% of the stimulated spines had  
118 shrunk ( $-\Delta V_H > 30\%$ , 15 of 44 spines/18 dendrites/8 mice) and that the mean amplitude  
119 at 20–50 min was  $19\% \pm 4\%$  ( $n = 44$ ), which was similar to the findings of the young  
120 hippocampus *in vitro* ( $23\% \pm 7\%$ ,  $n = 8$ ) (Noguchi et al., 2011). The shrinkage was  
121 long-lived ( $>80$  min) in most (73%) spines (*Figure 2D*). Shrinkage was absent when we  
122 added the NMDA receptor antagonist APV in the perfusion solution (*Figure 2C; Figure*  
123 *2–figure supplement 1A*).

124 Spine shrinkage spread to neighboring spines, which also occurred in hippocampal  
125 slice culture samples (Hayama et al., 2013; Noguchi et al., 2016). We calculated the  
126 average spine volume of the stimulated spines and the neighboring spines at 20–50 min  
127 from the onset of stimulation (*Figure 2E*). We found that the diffusion of spine  
128 shrinkage was only significant in spines next to the stimulated spines ( $<3 \mu\text{m}$ ). Only  
129 12% of spines within  $3 \mu\text{m}$  of a stimulated spine showed shrinkage ( $-\Delta V_{\text{Stimulated}} > 30\%$ ;  
130 *Figure 2–figure supplement 1B*). Thus, the spread of spine shrinkage was more stringent  
131 *in vivo* than *in vitro* in which shrinkage spread to 71% of spines within  $3 \mu\text{m}$  from a  
132 stimulated spine and to 38% of spines within  $7 \mu\text{m}$  (Hayama et al., 2013; Noguchi et al.,

133 2016).

134 We found that the prestimulation spine volume showed a weak but insignificant  
135 correlation with spine shrinkage (*Figure 2–figure supplement 1C*). Spine retraction  
136 occurred during spine shrinkage (*Figure 2F*) (Hayama et al., 2013); however, spine  
137 shrinkage was insignificantly correlated with retraction ( $\Delta$ Spine length; *Figure 2–figure*  
138 *supplement 1D*). We did not observe any interspine distance dependency in the  
139 induction of spine shrinkage (*Figure 2–figure supplement 2A*). Spine shrinkage was also  
140 insignificantly correlated with the initial spine neck length, dendritic depth, and age of  
141 mice (*Figure 2–figure supplement 2B–D*).

142

### 143 **Stringent structural plasticity of dendritic spines in the neocortex *in vivo***

144

145 We found that two-photon uncaging could induce prominent plasticity of spine  
146 structures in the adult neocortex *in vivo* that was similar to that of the hippocampus *in*  
147 *vitro*. The major difference was the low success rate of spine enlargement *in vivo* (22%  
148 vs. 95% *in vitro*), which was not caused by technical factors (*Figure 1G*). The success  
149 rate in inducing shrinkage was similar to that of the hippocampus, albeit its spread in  
150 the neocortex was limited. It remains to be clarified why enlargement is restricted in the  
151 neocortex, and whether it may occur after repeated reactivation *in vivo*. In summary,  
152 spine structural plasticity occurs in a stringent manner in the neocortex *in vivo*, which  
153 may provide a cellular basis for slow learning in the cortex (Lisman et al., 2001).

154

155

## 156 **Materials and Methods**

### 157 **Surgery for the *in vivo* mouse experiment**

158 All animal procedures were approved by the Animal Experiment Committee of the  
159 University of Tokyo (Tokyo, Japan). Procedures were conducted in accordance with the  
160 University of Tokyo Animal Care and Use Guidelines. The surgical procedure was  
161 previously described (Noguchi et al., 2011). In brief, we anesthetized adult mice  
162 expressing GFP or YFP in a subset of neurons: Thy1 GFP in the M line [GFP-M] or  
163 YFP in the H line [YFP-H]. Eighteen mice, aged  $148 \pm 129$  days (expressed as the mean  
164  $\pm$  the SD), were used for the enlargement condition (YFP-H, 14 mice; GFP-M, 4 mouse).  
165 Eight mice, aged  $70 \pm 19$  days, were used for the shrinkage condition (YFP-H, 7 mice;  
166 GFP-M, 1 mice). They were anesthetized with intraperitoneal injections of urethane and  
167 xylazine at 1.2 g/kg body weight and 7.5 mg/kg body weight, respectively, which were  
168 supplemented with the subcutaneous administration of the analgesic ketoprofen (20  
169 mg/kg body weight). A steel plate with a recording chamber was attached to the skull  
170 by using cyanoacrylate glue so that the recording chamber was attached to the skull just  
171 above the visual cortex (3.0 mm posterior, 2.5 mm lateral to the bregma) (Paxinos &  
172 Franklin, 2001). The plate was then tightly fixed to the metal platform. We then  
173 removed the skull using a pair of forceps and a dental drill, which was fixed to a  
174 stereotaxic instrument (Narishige, Tokyo, Japan). The dura mater was carefully  
175 removed using fine forceps and a microhook to minimize any pressure applied to the  
176 brain surface. We then placed a semicircular glass coverslip to cover approximately  
177 one-half of the exposed brain surface (*Figure 1A*). The coverslip was fixed using dental  
178 acrylic (Fuji-Lute BC; GC Corp., Tokyo, Japan) or a stainless wire. The mice were



179 supplied with humidified oxygen gas and warmed to 37°C with a heating pad (FST-  
180 HPS; Fine Science Tools Inc., North Vancouver, Canada).

181

## 182 **Two-photon *in vivo* imaging and uncaging**

183 *In vivo* two-photon imaging and uncaging were conducted using an upright microscope  
184 (BX61WI; Olympus, Tokyo, Japan) equipped with a FV1000 laser scanning microscope  
185 system (Olympus) and a water-immersion objective lens (LUMPlanFI/IR 60× with a  
186 numerical aperture of 0.9; Olympus). The system included two mode-locked  
187 femtosecond-pulse titanium-sapphire lasers (MaiTai; Spectra Physics, Mountain View,  
188 CA, USA). The laser was set at 720 nm and used for uncaging (Matsuzaki et al., 2001).  
189 The other laser was set at 980 nm and used for imaging. Each light path was connected  
190 to the microscope via an independent scan head and acousto-optic modulator. For the 3-  
191 D reconstruction of the dendrite images, 21–40 XY images separated by 0.5 μm were  
192 stacked by summing the fluorescence values at each pixel. 4-Methoxy-7-nitroindoliny  
193 (MNI)-glutamate or 4-carboxymethoxy-5,7-dinitroindoliny (CDNI)-glutamate was  
194 custom-synthesized by Nard institute Ltd. (Amagasaki, Japan) or purchased from Tocris  
195 Bioscience (Bristol, UK) was perfused in the recording chamber in artificial cerebral  
196 spinal fluid (ACSF).

197

## 198 ***In vivo* enlargement of dendritic spines**

199 For the *in vivo* spine enlargement experiments, the cortical surface was first superfused  
200 with magnesium-free ACSF (ACSF w/o Mg<sup>2+</sup>) containing 125 mM NaCl, 2.5 mM KCl,  
201 3 mM CaCl<sub>2</sub>, 0 mM MgCl<sub>2</sub>, 1.25 mM NaH<sub>2</sub>PO<sub>4</sub>, 26 mM NaHCO<sub>3</sub>, 20 mM glucose, and

202 10  $\mu\text{M}$  tetrodotoxin (Nacalai, Kyoto, Japan). This solution was bubbled with 95%  
203 oxygen and 5% carbon dioxide for approximately  $30 \pm 15$  min (expressed as the mean  $\pm$   
204 the SD; 20 dendrites). The bathing solution was then changed to ACSF w/o  $\text{Mg}^{2+}$   
205 containing 20 mM MNI-glutamate or 10 mM CDNI-glutamate and 200  $\mu\text{M}$  Trolox  
206 (Sigma-Aldrich, St. Louis, MO, USA), thereby enabling its diffusion into the cortical  
207 extracellular space approximately 15 min before the uncaging experiments. Two-photon  
208 uncaging was aimed at the tip of the spines, and repeated 60 times at 1 Hz. The power  
209 of the uncaging laser was typically set at 10 mW with an activation time of 0.6 ms. We  
210 expected that transient currents similar to miniature excitatory-postsynaptic currents  
211 were roughly elicited at this laser power; however, in this experiment we did not fine-  
212 tune the power along the cortical depth (Noguchi et al., 2011). For each experiment, 2–8  
213 spines (average, 4.6 spines) were stimulated along a dendrite. We studied 52 spines/15  
214 dendrites/14 mice with MNI-glutamate, and 22 spines/5 dendrites/4 mice with CDNI-  
215 glutamate. The success rate of enlargement was 25% and 13%, respectively. The  
216 solution was pooled in a small reservoir (2 mL) (*Figure 1A*). We constantly added pure  
217 water (after determining its flow rate empirically) to the reservoir to maintain the  
218 osmotic pressure of the solution at approximately 320 mOsm/kg. The solution was  
219 warmed at  $37^\circ\text{C}$  on the chamber by using circulating hot water (*Figure 1A*). All  
220 physiological experiments were conducted at  $37^\circ\text{C}$ .

221

### 222 ***In vivo* shrinkage of dendritic spines**

223 For the spine shrinkage experiments, the cortical surface was superfused with ACSF  
224 containing 2 mM  $\text{CaCl}_2$  and 1 mM  $\text{MgCl}_2$ . The bathing solution was then changed to  
225 ACSF that additionally contained 200  $\mu\text{M}$  Trolox and a caged compound (i.e., 20 mM

226 MNI-glutamate or 10 mM CDNI-glutamate). We studied 39 spines/16 dendrites/7 mice  
227 with MNI-glutamate, and 5 spines/2 dendrites/1 mice with CDNI-glutamate. The  
228 success rate of shrinkage was 36% and 25%, respectively. Repetitive stimulation was  
229 conducted at 1–2 Hz for 5–15 min with laser powers similar to those used for  
230 enlargement (~10 mW). As a control, the stimulation was also conducted in the presence  
231 of 50 mM D-2-amino-5-phosphonovaleric acid (APV), which is an NMDA receptor  
232 antagonist with MNI-glutamate.

233

#### 234 **Analysis of the spine volume**

235 Spine head volumes were estimated from the total fluorescence intensity by summing  
236 the fluorescence values of stacked images of the 3-D data, as previously reported using  
237 Image-J software (NIH, Bethesda, Maryland, USA)(Noguchi et al., 2011). When the  
238 image showed axon fibers overlapping with the target dendrite at different image  
239 depths, the spine head volume in the dendrite was calculated by partially summing the  
240 fluorescence values of sequential five Z-images by taking the moving average of the  
241 image stack along the Z-direction to avoid axonal fibers. A dendritic spine is near the  
242 diffraction limit of a two-photon microscope; therefore, the partially summed values (2-  
243  $\mu\text{m}$  range in the Z-direction) should contain nearly the entire spine volume. Thus, the  
244 maximum value of the Z-moving average images allows good approximation of the  
245 total Z-summing of the stacked images.

246 Dendritic spines have spontaneous fluctuations in fluorescence because of  
247 spontaneous morphological changes, motility, or measurement errors. To determine  
248 spine volume fluctuations, we calculated the CV of the *in vivo* images before glutamate  
249 uncaging ( $14.7\% \pm 16.1\%$  for 227 spines in the enlargement condition and  $12.5\% \pm$

250 7.9% for 196 spines in the shrinkage condition). We set the limit values of the  
251 fluctuation of the baseline as 2 CV (i.e., 30% for the enlargement data; 25% for the  
252 shrinkage data) and discarded the data when the fluctuation exceeded the limit value.  
253 Stimulated spines and neighboring spines with a prestimulation fluctuation over this  
254 limit (i.e., unstable spines) were discarded, as were the neighbors of the unstable  
255 stimulated spines. For the spine volume analysis, the average spine volume during 10–  
256 30 min (i.e., enlargement) or 20–50 min (i.e., shrinkage) after the onset of the  
257 stimulation was calculated and are indicated as the difference from the baseline volume.

258

### 259 **Analysis of the spine neck length and the spine length**

260 The 3-D spine neck length was measured manually using Image-J software (Noguchi et  
261 al., 2011). An XYZ stack image was resliced at  $z = 0.1 \mu\text{m}$ , and an XZ image of the  
262 spine neck was created. The intensity profile was measured along the neck in the XZ  
263 image. The half-maximum position of the spine and the parent dendrite was the edge of  
264 the spine and the dendrite, respectively. The spine neck length was calculated by  
265 subtracting the radiuses of the dendrite and the spine from the distance between peaks of  
266 the spine and the dendrite (*Figure 1B and Figure 2–figure supplement 2B*). For the  
267 analysis of the spine length before and after stimulation, the length between the tip of  
268 the spine and the edge of the dendrite was measured on the Z-stack images (*Figure 2–*  
269 *figure supplement 1D*).

270

### 271 **Statistical analysis**

272 All data are presented as the mean  $\pm$  standard error of the mean (SEM) ( $n$  indicates the  
273 number of spines), unless otherwise stated. Statistical tests of the spines were conducted

274 using Excel-Statistics software (Social Survey Research Information Co. Ltd., Tokyo,  
275 Japan), as indicated. Differences from the baseline values were analyzed using the  
276 Wilcoxon signed-rank test (*Figure 1F; Figure 2E; and Figure 2-figure supplement 1A*).  
277 Differences between groups were analyzed using the Mann–Whitney rank sum test  
278 (*Figure 2-figure supplement 1B*). The Pearson’s product-moment correlation coefficient  
279 was calculated for the scatter plots (*Figure 1G; Figure 1-figure supplement 2A–D; and*  
280 *Figure 2-figure supplement 2A–2D*). The significance of a correlation coefficient was  
281 analyzed by using the *t*-test.

282

## 283 **Acknowledgements**

284 We thank C. Maeda, M. Ogasawara, H. Ohno, K. Tamura, M. Nakajima, C. Matsubara  
285 and T. Sasaki for their technical assistance. We also thank N. Ichinohe for the helpful  
286 discussion and support. This work was supported by Grants-in-Aids for Science  
287 Research (S) (grant no. 26221011 to H.K.), Scientific Research (C) (grant numbers  
288 18K06497 and 26430005 to J.N. and grant no. 2640290 to N.T.), Scientific Research on  
289 Innovative Areas (grant number 26111706 to J.N. and grant no. 16H06396 to S.Y.) and  
290 the Cooperative Research Program of “Network Joint Research Center for Materials and  
291 Devices” (grant no. 20171030 to J.N.), and World Premier International Research  
292 Center Initiative (awarded to HK) from the Ministry of Education, Culture, Sports,  
293 Science and Technology ([MEXT]; Tokyo, Japan), and Core Research of Evolutional  
294 Science and Technology ([CREST]; Tokyo, Japan; grant no. JPMJCR1652 to H.K.)  
295 from Japan Science and Technology Agency ([JST]; Tokyo, Japan), and the Strategic  
296 International Research Cooperative Program (SICP), Brain/MIND, and Strategic  
297 Research Program for Brain Sciences projects (grant no. 17dm0107120h0002) from the  
298 Agency for Medical Research and Development (awarded to H.K.).

299

## 300 **Competing Interests**

301 The authors declare no competing interests.

302

## 303 **Author Contributions**

304 J.N. and H.K. are co-corresponding authors and designed the study; J.N. conducted most  
305 imaging experiments; A.N., H.U., T.H., S.Y. and N.T. assisted in some imaging  
306 experiments and in the data analysis; J.N. and H.K. wrote the manuscript. All authors  
307 contributed to the editing of the paper.

308

## 309 **Figure Legends**

310

311 **Figure 1. Induction of spine enlargement in the visual cortex *in vivo*.** (A) Schematic  
312 drawing of the experiment. Transgenic mice that expressed green fluorescent protein  
313 (GFP) or yellow fluorescent protein (YFP) in neocortex layer 5/6 pyramidal neurons  
314 were urethane-anesthetized and placed under an objective lens using a metal chamber.  
315 Skull and dura over the neocortex V1 area were carefully removed, and a half-moon-  
316 shaped coverslip was placed on the brain surface. A perfusion solution containing caged  
317 glutamate and 10  $\mu$ M tetrodotoxin (TTX), but no magnesium ( $Mg^{2+}$ ) ions, was steadily  
318 circulated using peristaltic pumps. After diffusing the caged glutamate into the brain  
319 parenchyma, caged glutamate was photolyzed at the tip of dendritic spines by using  
320 two-photon uncaging at the wavelength of 720 nm. Dendrite images were obtained by  
321 another laser light path (see the “Materials and Methods” section for details). (B) Time-  
322 lapse images of the stimulated spines. Several spines (average, 4.5 spines) in each  
323 dendrite have been stimulated with repetitive two-photon glutamate uncaging. The red  
324 dots show the position of the uncaging. The blue and red arrowheads show the  
325 stimulated spines. (C) Time courses in the increase in the volume of spine a (blue) and  
326 spine b (red) in panel B. (D) The averaged time courses of the spine-head volume  
327 increment are plotted for spines with >30% enlargement (orange circles), spines with  
328 <30% enlargement (green circles), and unstimulated neighbor spines (black circles) ( $n =$   
329 16,  $n = 68$ , and  $n = 92$  spines for enlarged spines, unenlarged spines, and neighbors,  
330 respectively). (E) Ratio of the change in head volume ( $\Delta V_H$ ) >30% in the enlarged  
331 spines and the longevity of the enlargement. The left stacked bar presents the ratio of  
332 the enlarged spines (22%) to the remaining spines (78%) of all (20) dendrites. The right



333 stacked bar presents the distribution of the enlargement duration. The numbers in the  
334 histograms indicate the number of spines. **(F)** The average increases in the spine  
335 volumes ( $109\% \pm 24\%$ ) in 16 stimulated spines and in neighboring spines located  $<3 \mu\text{m}$   
336 ( $2.2\% \pm 4.6\%$ ; 12 spines) and at  $3\text{--}10 \mu\text{m}$  ( $2.0\% \pm 6.0\%$ ; 8 spines).  $**p < 0.01$ , based on  
337 Wilcoxon signed-rank test against zero. The error bars represent the standard error of  
338 the mean (SEM). **(G)** Scatter plots of the average spine enlargement (10–30 min after  
339 stimulation [i.e.,  $\Delta V_H$ ]) of the stimulated spines against the distance between the most  
340 shrunken spine of each dendrite and other stimulated spines. Pearson's product-moment  
341 correlation coefficient was calculated for the scatter plots.

342

343 **Figure 1—figure supplement 1. A diagram of the typical *in vivo* uncaging**

344 **experiment.** **(A)** The surface of the cortex is superfused with artificial cerebral spinal  
345 fluid (ACSF) solution containing 4-carboxymethoxy-5,7- dinitroindolyl (CDNI) but  
346 devoid of magnesium ( $\text{Mg}^{2+}$ ). **(B)** The amplitude histogram of prestimulation spine  
347 volume fluctuations. The mean coefficient of variation (CV) is approximately 15% and  
348 is unaltered by the low  $\text{Mg}^{2+}$  solution. We thus set the threshold at 30% (i.e., 2 CV) for  
349 enlargement and for shrinkage.

350

351 **Figure 1—figure supplement 2. Investigation of the spine enlargement conditions.**

352 Scatter plots of the average spine enlargement of the stimulated spines (i.e., change in  
353 the head volume [ $\Delta V_H$ ]) at 10–30 min after the stimulation against the relative  
354 prestimulation spine head volume for **(A)** each dendrite, **(B)** spine neck length, **(C)**  
355 dendrite depth, **(D)** and age of mice. Average enlargement of the stimulated spines from  
356 animals 0–60 days old ( $42.3\% \pm 14.2\%$ , 26 spines, 5 mice), 61–200 days old ( $8.9\% \pm$

357 4.7%, 23 spines, 6 mice), and 200+ days old ( $16.6\% \pm 16.0\%$ , 25 spines, 7 mice). Pearson's  
358 product-moment coefficient was calculated. The gray dotted and solid lines show the  
359 linear regression slopes.

360

361 **Figure 2. Induction of spine shrinkage *in vivo*.** (A) Representative images of spine  
362 shrinkage. We stimulated, on average, 2.8 spines in a dendrite using the method used for  
363 the enlargement experiments. However, the perfusion solution contained 1 mM  
364 magnesium ( $Mg^{2+}$ ). Spines (S1, red arrowheads) stimulated with low-frequency two-  
365 photon glutamate uncaging (1 Hz, 15 min) show significant shrinkage. A neighboring  
366 spine is also shrunken (n1, yellow arrowheads) but another neighboring spine is not  
367 shrunken (n2, white arrowheads). The uncaging point is indicated by a small red dot.

368 (B) Time-courses of the spine head volumes in panel A. The red, yellow, and white  
369 circles indicate the traces of spines S1, n1 and n2, respectively. (C) Average time  
370 courses for the stimulated spines without (red circles) or with the NMDA receptor  
371 antagonist APV (blue diamonds). Forty-four spines were not exposed to APV and 12  
372 spines were exposed to APV. Average time courses of the neighbors located  $<3 \mu m$   
373 (black circle) or  $3-10 \mu m$  (gray circle) from the stimulated spines are also plotted (58  
374 spines for  $<3 \mu m$  and 64 spines for  $3-10 \mu m$ ). (D) The ratio of the shrinkage in the  
375 volume head ( $-\Delta V_H$ )  $>30\%$  in the stimulated spines and the longevity of the shrinkage.  
376 The left stacked bar chart presents the ratio of shrunken spines to the remaining spines  
377 of all (16) dendrites. The right chart presents the distribution of the shrinkage duration.  
378 The numbers in the bars indicate the number of spines. (E) The average amplitude of  
379 shrinkage of the stimulated spines ( $-19.1\% \pm 4.3\%$ , 44 spines) and the neighboring  
380 spines  $<3 \mu m$  ( $-10.2\% \pm 3.8\%$ , 58 spines) or  $3-10 \mu m$  ( $1.8\% \pm 3.5\%$ , 64 spines) from the

381 stimulated spines.  $*p < 0.05$  and  $**p < 0.01$ , based on Wilcoxon signed-rank test against  
382 zero. The error bars represent the standard error of the mean (SEM). (F) Three  
383 representative images of spine retraction after the low-frequency stimulation. The red  
384 dots and yellow arrows represent the uncaging points and direction of the retraction,  
385 respectively.

386

387 **Figure 2—figure supplement 1. Properties of spine shrinkage.** (A) The bar graph  
388 presents spine shrinkage (i.e., change in the volume head [ $\Delta V_H$ ]) in the absence ( $19\% \pm$   
389  $4\%$ , 44 spines) and in the presence ( $1.1\% \pm 3.3\%$ , 12 spines) of the NMDA receptor  
390 antagonist APV. The error bars represent the standard error of the mean (SEM).  $**p <$   
391  $0.0001$ , based on Wilcoxon signed-rank test against zero. (B) The spine shrinkage of  
392 neighboring spines ( $[\Delta V_{\text{Neighbors}}]$ ) at  $<3 \mu\text{m}$  is plotted against the spine shrinkage of the  
393 stimulated spines ( $\Delta V_{\text{Stimulated}}$ ). The average values are calculated within the ranges of  
394  $\Delta V_{\text{Stimulated}}$ , as indicated above the plot. The error bars represent the standard deviation  
395 (SD).  $*p < 0.05$ , based on Wilcoxon signed-rank test against zero. The scatter plots of  
396 the average spine shrinkage ( $\Delta V_H$ ) of the stimulated spines against the spine properties  
397 present (C) the relative prestimulation spine head volume in each dendrite and (D) the  
398 spine retraction just after the end of the stimulation. The average retraction was  $-0.27 \pm$   
399  $0.07 \mu\text{m}$  (44 spines) and was significant ( $p = 0.0004$ ), based on Wilcoxon signed-rank  
400 test against zero. Spearman's rank correlation coefficient was calculated. The solid lines  
401 are the linear regression slopes.

402

403 **Figure 2—figure supplement 2. Conditions of spine shrinkage.** Scatter plots of the  
404 average spine shrinkage (i.e., change in the head volume [ $\Delta V_H$ ]) of the stimulated

405 spines against **(A)** the distance between the most shrunken spine of each dendrite and  
406 other stimulated spines, **(B)** the prestimulation spine neck length, **(C)** the dendrite depth,  
407 and **(D)** the animal's age **(D)**. Pearson's product-moment correlation coefficients were  
408 calculated. The solid lines present the linear regression slopes.

409

410

411

## 412 **References**

413

414 Asrican, B., Lisman, J., & Otmakhov, N. (2007). Synaptic strength of individual spines  
415 correlates with bound Ca<sup>2+</sup>-calmodulin-dependent kinase II. *J Neurosci*, *27*(51),  
416 14007-14011. doi:10.1523/JNEUROSCI.3587-07.2007

417 Beique, J. C., Lin, D. T., Kang, M. G., Aizawa, H., Takamiya, K., & Huganir, R. L. (2006).  
418 Synapse-specific regulation of AMPA receptor function by PSD-95. *Proc Natl*  
419 *Acad Sci U S A*, *103*(51), 19535-19540. doi:10.1073/pnas.0608492103

420 Bhatt, D. H., Zhang, S., & Gan, W. B. (2009). Dendritic spine dynamics. *Annu Rev*  
421 *Physiol*, *71*, 261-282. doi:10.1146/annurev.physiol.010908.163140

422 Bosch, M., Castro, J., Saneyoshi, T., Matsuno, H., Sur, M., & Hayashi, Y. (2014).  
423 Structural and Molecular Remodeling of Dendritic Spine Substructures during  
424 Long-Term Potentiation. *Neuron*, *82*(2), 444-459.  
425 doi:10.1016/j.neuron.2014.03.021

426 Fiala, J. C., Spacek, J., & Harris, K. M. (2002). Dendritic spine pathology: cause or  
427 consequence of neurological disorders? *Brain Res.Rev.*, *39*(1), 29-54.

428 Forrest, M. P., Parnell, E., & Penzes, P. (2018). Dendritic structural plasticity and  
429 neuropsychiatric disease. *Nat Rev Neurosci*, *19*(4), 215-234.  
430 doi:10.1038/nrn.2018.16

431 Govindarajan, A., Israely, I., Huang, S. Y., & Tonegawa, S. (2011). The dendritic branch  
432 is the preferred integrative unit for protein synthesis-dependent LTP. *Neuron*,  
433 *69*(1), 132-146. doi:10.1016/j.neuron.2010.12.008

434 Harvey, C. D., & Svoboda, K. (2007). Locally dynamic synaptic learning rules in  
435 pyramidal neuron dendrites. *Nature*, *450*(7173), 1195-1200.  
436 doi:10.1038/nature06416

437 Hayama, T., Noguchi, J., Watanabe, S., Takahashi, N., Hayashi-Takagi, A., Ellis-Davies,  
438 G. C., . . . Kasai, H. (2013). GABA promotes the competitive selection of dendritic  
439 spines by controlling local Ca<sup>2+</sup> signaling. *Nat Neurosci*, *16*(10), 1409-1416.  
440 doi:10.1038/nn.3496

- 441 Hayashi-Takagi, A., Yagishita, S., Nakamura, M., Shirai, F., Wu, Y. I., Loshbaugh, A.  
442 L., . . . Kasai, H. (2015). Labelling and optical erasure of synaptic memory traces  
443 in the motor cortex. *Nature*, *525*(7569), 333-338. doi:10.1038/nature15257
- 444 Holbro, N., Grunditz, A., & Oertner, T. G. (2009). Differential distribution of endoplasmic  
445 reticulum controls metabotropic signaling and plasticity at hippocampal synapses.  
446 *Proc Natl Acad Sci U S A*, *106*(35), 15055-15060. doi:10.1073/pnas.0905110106
- 447 Holtmaat, A., & Svoboda, K. (2009). Experience-dependent structural synaptic plasticity  
448 in the mammalian brain. *Nat Rev Neurosci*, *10*(9), 647-658. doi:10.1038/nrn2699
- 449 Honkura, N., Matsuzaki, M., Noguchi, J., Ellis-Davies, G. C., & Kasai, H. (2008). The  
450 subspine organization of actin fibers regulates the structure and plasticity of  
451 dendritic spines. *Neuron*, *57*(5), 719-729. doi:10.1016/j.neuron.2008.01.013
- 452 Kasai, H., Fukuda, M., Watanabe, S., Hayashi-Takagi, A., & Noguchi, J. (2010).  
453 Structural dynamics of dendritic spines in memory and cognition. *Trends Neurosci*,  
454 *33*(3), 121-129. doi:10.1016/j.tins.2010.01.001
- 455 Kopec, C. D., Real, E., Kessels, H. W., & Malinow, R. (2007). GluR1 links structural and  
456 functional plasticity at excitatory synapses. *J Neurosci*, *27*(50), 13706-13718.  
457 doi:10.1523/jneurosci.3503-07.2007
- 458 Lee, S. J., Escobedo-Lozoya, Y., Szatmari, E. M., & Yasuda, R. (2009). Activation of  
459 CaMKII in single dendritic spines during long-term potentiation. *Nature*,  
460 *458*(7236), 299-304.
- 461 Lisman, J., & Morris, R. G. (2001). Memory. Why is the cortex a slow learner? *Nature*,  
462 *411*(6835), 248-249.
- 463 Matsuzaki, M., Ellis-Davies, G. C. R., Nemoto, T., Miyashita, Y., Iino, M., & Kasai, H.  
464 (2001). Dendritic spine geometry is critical for AMPA receptor expression in  
465 hippocampal CA1 pyramidal neurons. *Nat. Neurosci.*, *4*, 1086-1092.
- 466 Matsuzaki, M., Honkura, N., Ellis-Davies, G. C., & Kasai, H. (2004). Structural basis of  
467 long-term potentiation in single dendritic spines. *Nature*, *429*(6993), 761-766.  
468 doi:10.1038/nature02617
- 469 Noguchi, J., Hayama, T., Watanabe, S., Ucar, H., Yagishita, S., Takahashi, N., & Kasai,

- 470 H. (2016). State-dependent diffusion of actin-depolymerizing factor/cofilin  
471 underlies the enlargement and shrinkage of dendritic spines. *Sci Rep*, 6, 32897.  
472 doi:10.1038/srep32897
- 473 Noguchi, J., Matsuzaki, M., Ellis-Davies, G. C., & Kasai, H. (2005). Spine-neck  
474 geometry determines NMDA receptor-dependent Ca<sup>2+</sup> signaling in dendrites.  
475 *Neuron*, 46(4), 609-622. doi:10.1016/j.neuron.2005.03.015
- 476 Noguchi, J., Nagaoka, A., Watanabe, S., Ellis-Davies, G. C., Kitamura, K., Kano, M., . . .  
477 Kasai, H. (2011). In vivo two-photon uncaging of glutamate revealing the  
478 structure-function relationships of dendritic spines in the neocortex of adult mice.  
479 *J Physiol*, 589(Pt 10), 2447-2457. doi:10.1113/jphysiol.2011.207100
- 480 Oh, W. C., Hill, T. C., & Zito, K. (2013). Synapse-specific and size-dependent  
481 mechanisms of spine structural plasticity accompanying synaptic weakening.  
482 *Proc Natl Acad Sci U S A*, 110(4), E305-312. doi:10.1073/pnas.1214705110
- 483 Smith, M. A., Ellis-Davies, G. C., & Magee, J. C. (2003). Mechanism of the distance-  
484 dependent scaling of Schaffer collateral synapses in rat CA1 pyramidal neurons.  
485 *J Physiol*, 548(Pt 1), 245-258. doi:10.1113/jphysiol.2002.036376
- 486 Tanaka, J., Horiike, Y., Matsuzaki, M., Miyazaki, T., Ellis-Davies, G. C. R., & Kasai, H.  
487 (2008). Protein synthesis and neurotrophin-dependent structural plasticity of  
488 single dendritic spines. *Science*, 319(5870), 1683-1687.
- 489 Xu, T., Yu, X., Perlik, A. J., Tobin, W. F., Zweig, J. A., Tennant, K., . . . Zuo, Y. (2009).  
490 Rapid formation and selective stabilization of synapses for enduring motor  
491 memories. *Nature*, 462(7275), 915-919. doi:10.1038/nature08389
- 492 Yagishita, S., Hayashi-Takagi, A., Ellis-Davies, G. C., Urakubo, H., Ishii, S., & Kasai, H.  
493 (2014). A critical time window for dopamine actions on the structural plasticity of  
494 dendritic spines. *Science*, 345(6204), 1616-1620. doi:10.1126/science.1255514
- 495 Yasumatsu, N., Matsuzaki, M., Miyazaki, T., Noguchi, J., & Kasai, H. (2008). Principles  
496 of long-term dynamics of dendritic spines. *J Neurosci*, 28(50), 13592-13608.  
497 doi:10.1523/JNEUROSCI.0603-08.2008
- 498 Zhou, Q., Homma, K. J., & Poo, M. M. (2004). Shrinkage of dendritic spines associated  
499 with long-term depression of hippocampal synapses. *Neuron*, 44(5), 749-757.

500           doi:10.1016/j.neuron.2004.11.011

501   Zito, K., Scheuss, V., Knott, G., Hill, T., & Svoboda, K. (2009). Rapid functional  
502       maturation of nascent dendritic spines. *Neuron*, 61(2), 247-258.

503       doi:10.1016/j.neuron.2008.10.054

504



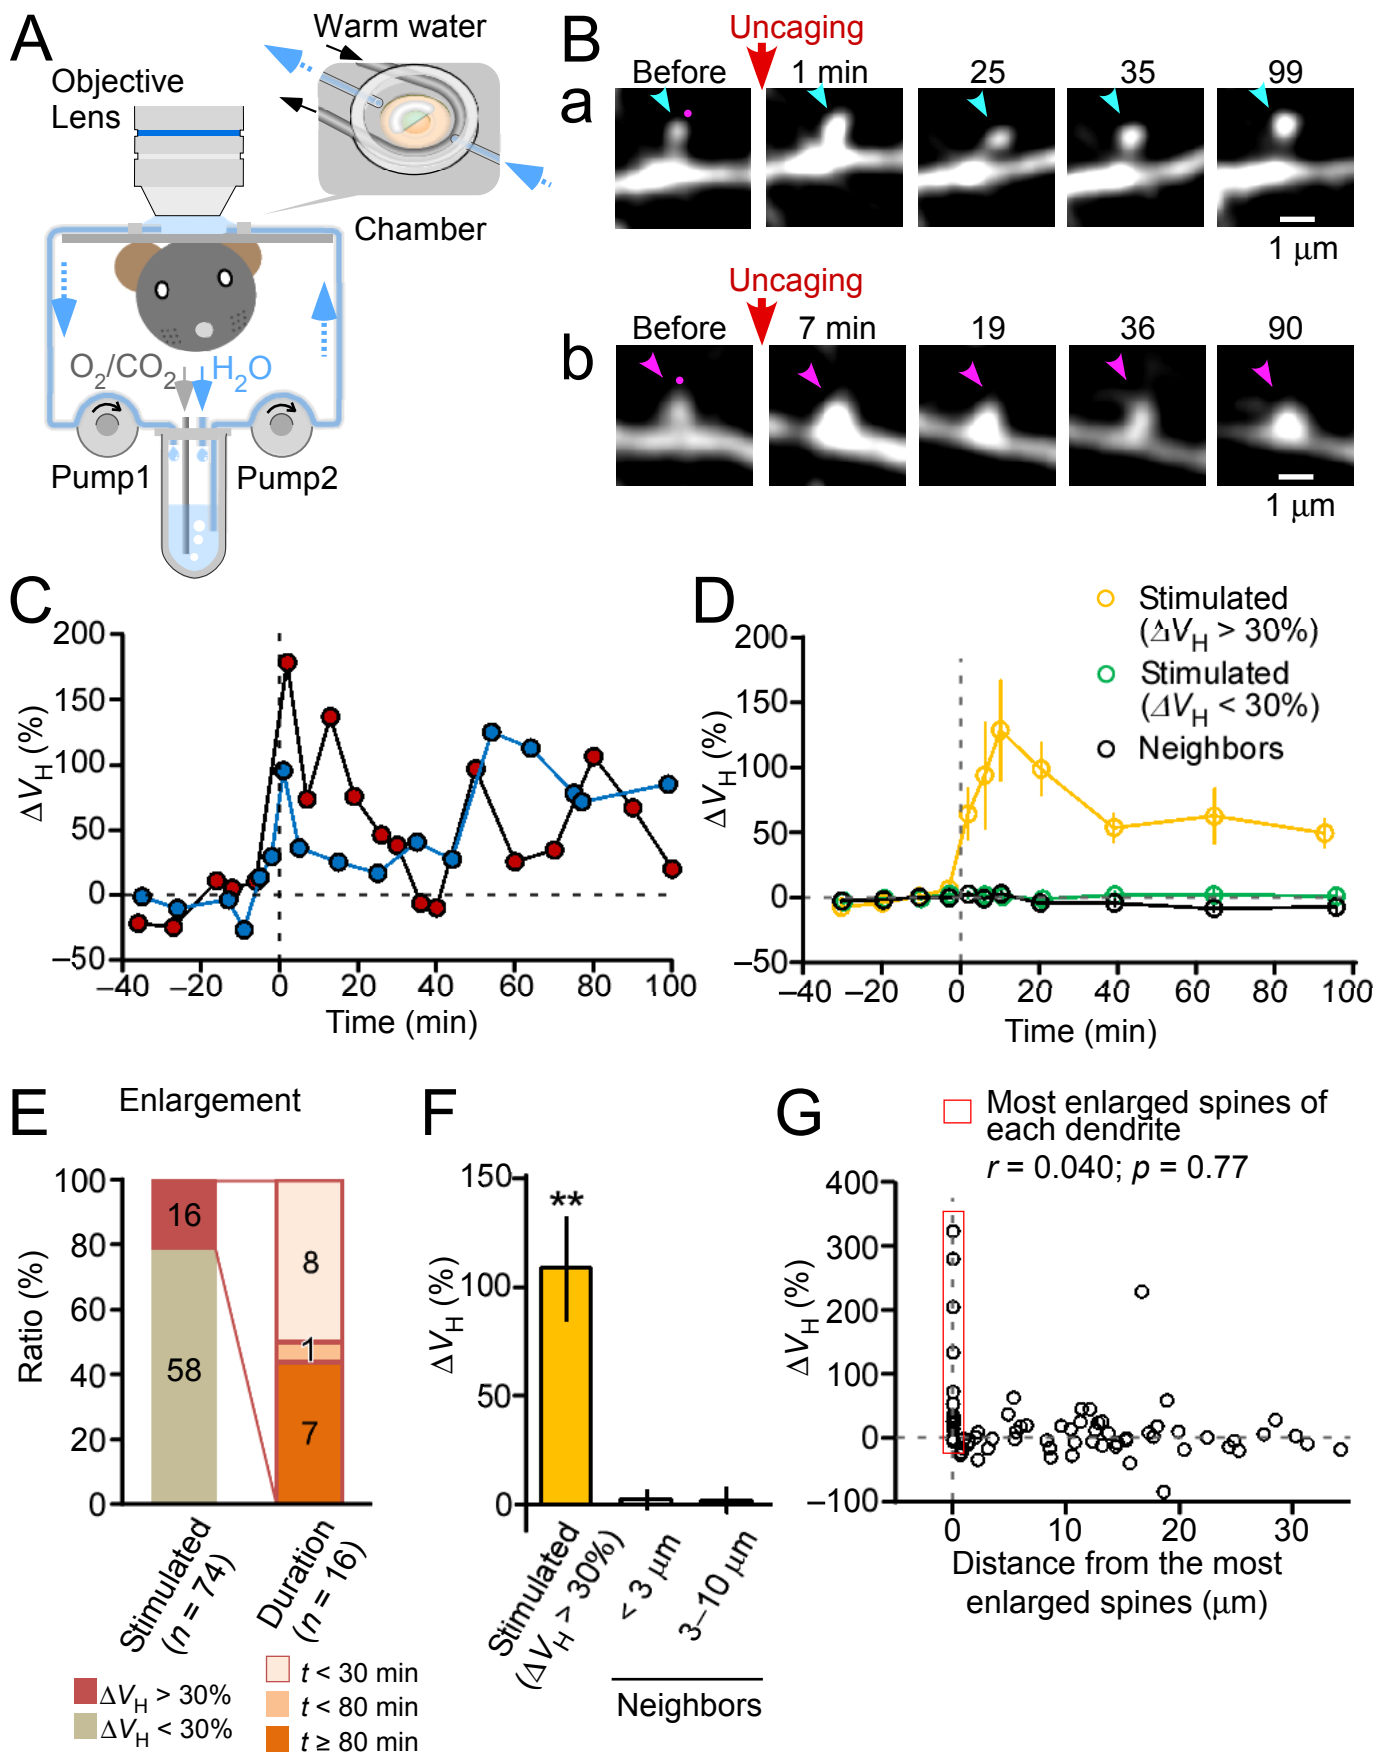

Figure 1 Noguchi, et al.

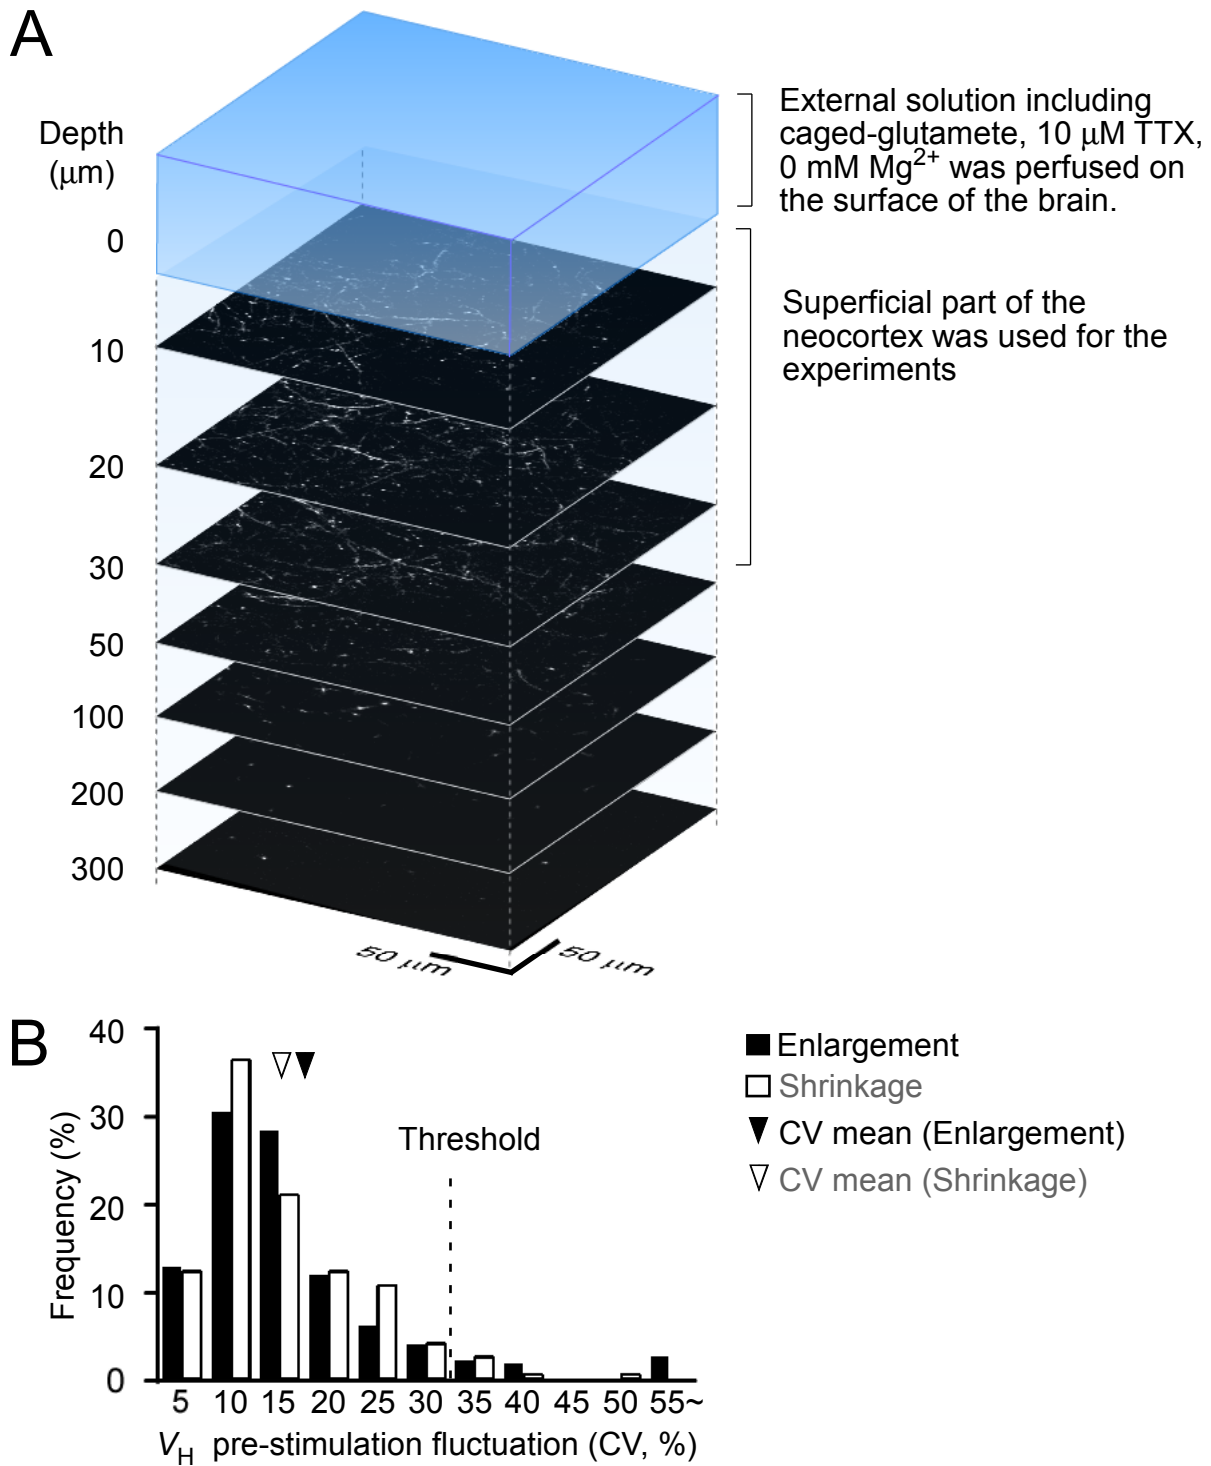

Figure 1-figure supplement 1

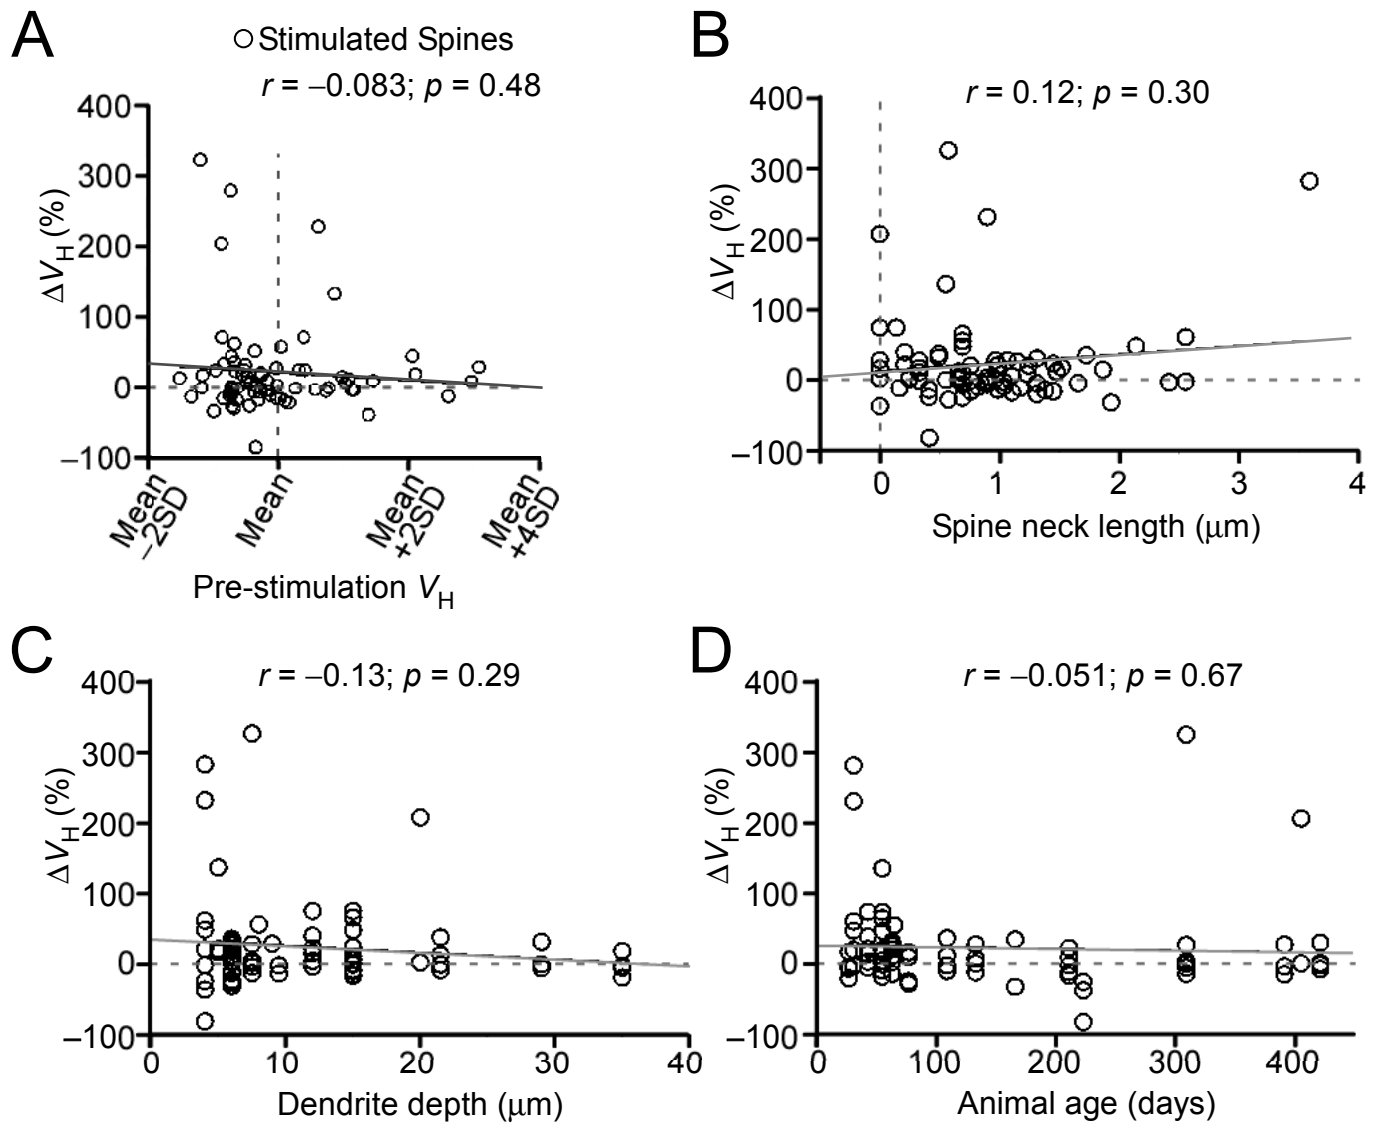

Figure 1-figure supplement 2

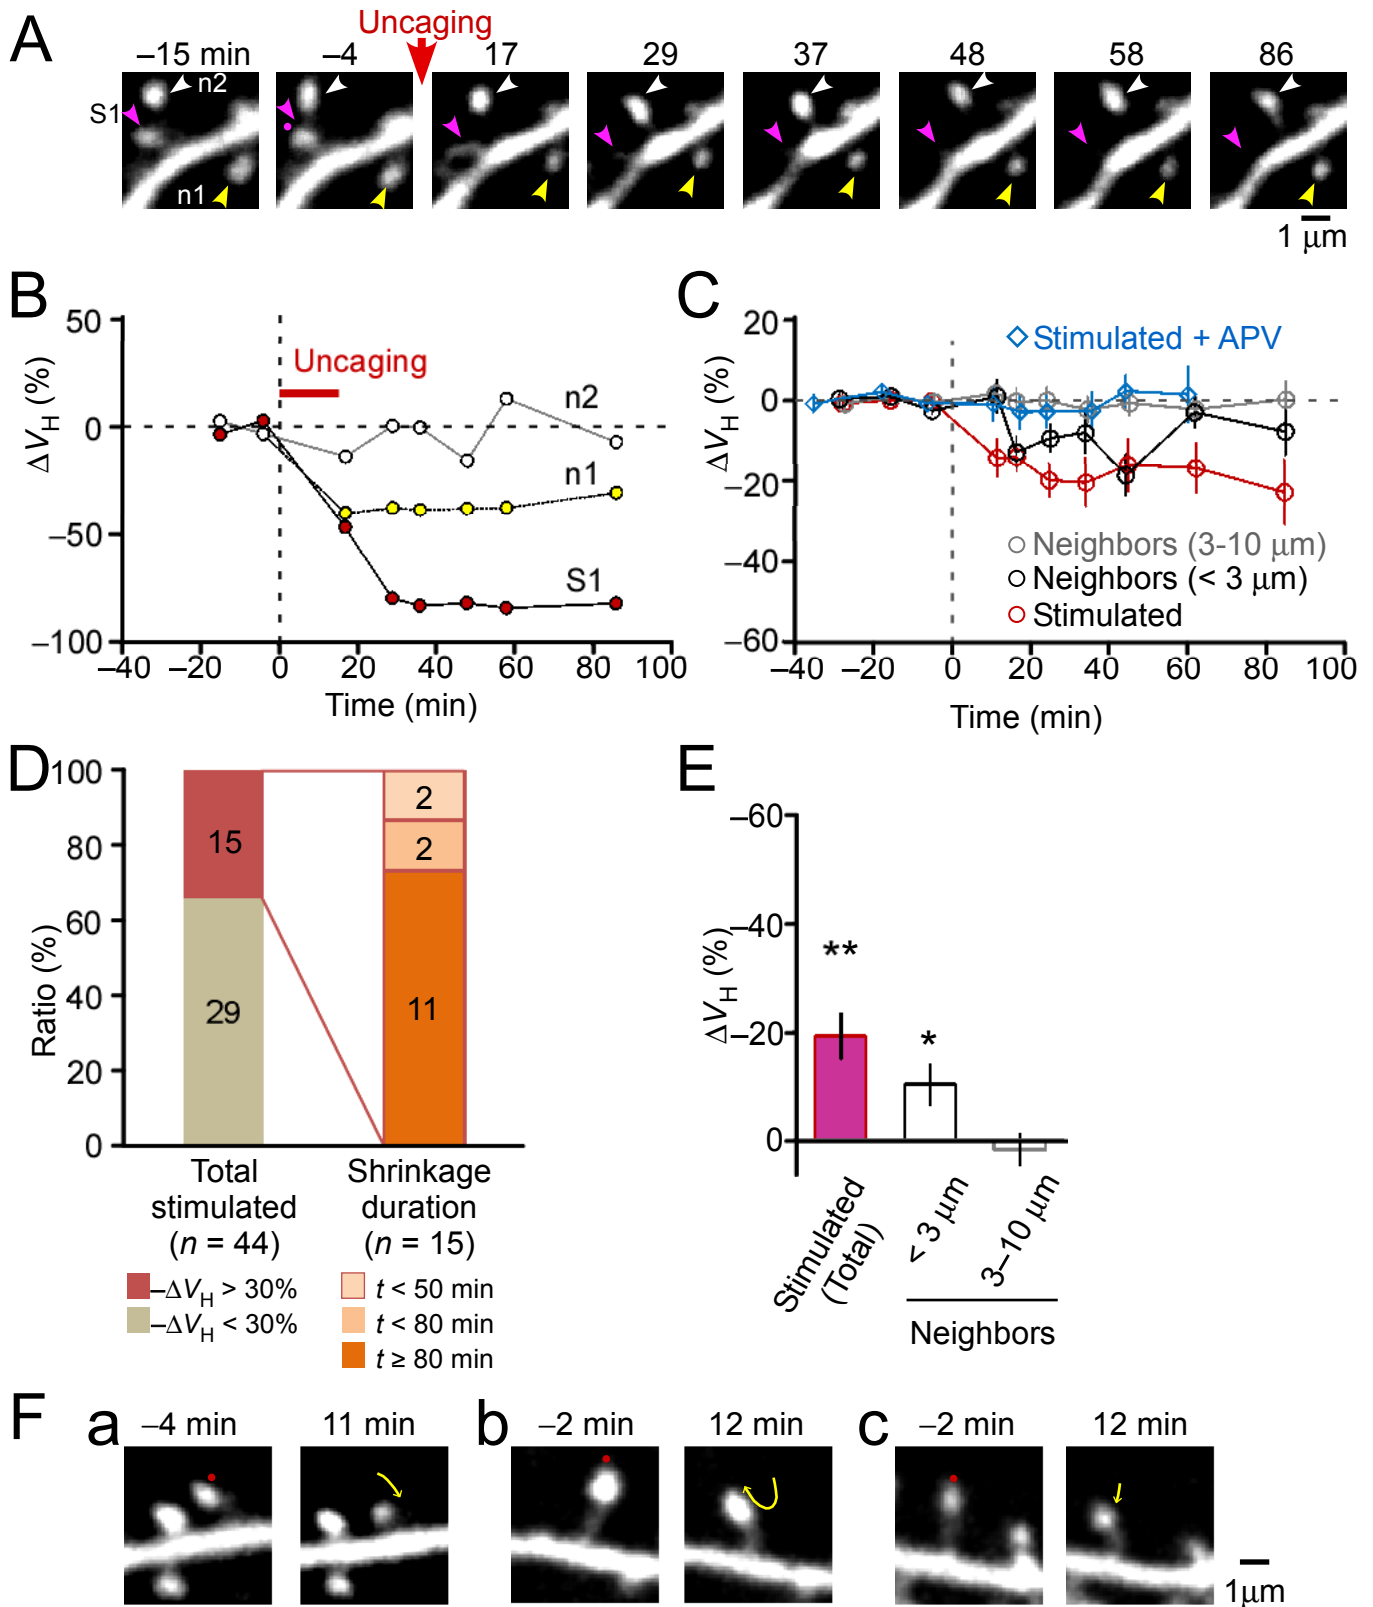

Figure 2 Noguchi, et al.

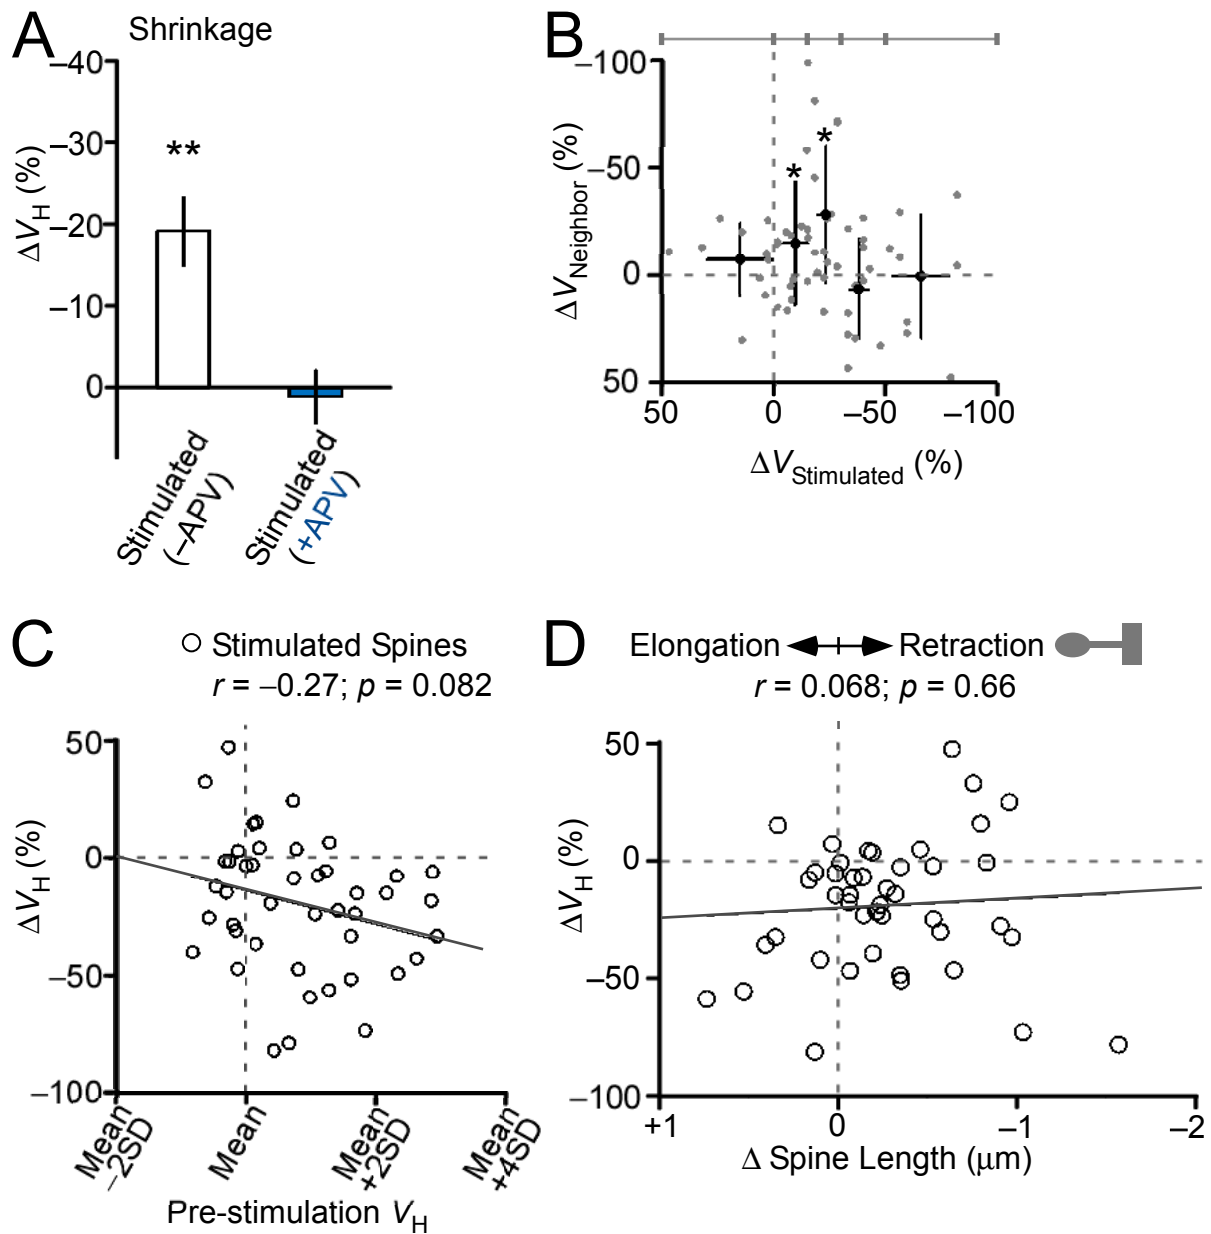

Figure 2-figure supplement 1

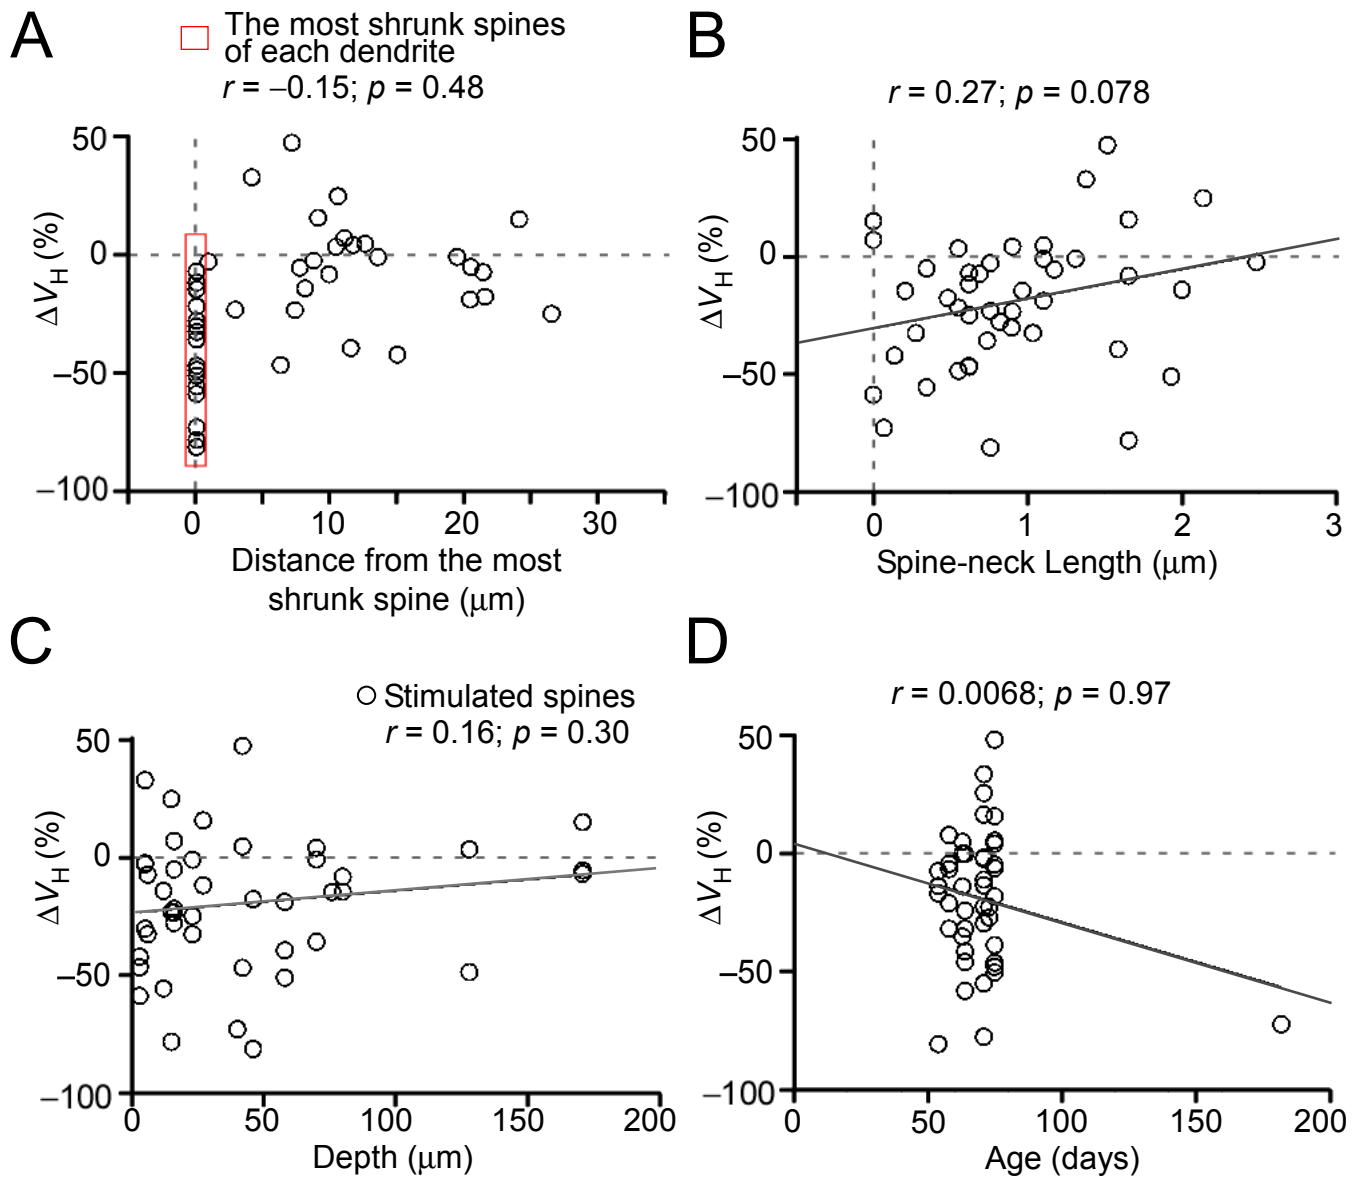

Figure 2-figure supplement 2
